the future, it was emphasized that the time of switching from a main to an auxillary supply should occur before line pressure drops due to near exhaustion of the main storage bank.

Even though new models of anesthesia machines and central gas supplies are becoming more widely distributed with evermore sophisticated safeguards, the vigilance of the individual anesthesiologist cannot be overemphasized.

OAK ZA CHI, M.D.  
Assistant Professor  
Department of Anesthesia  
University of Medicine and  
Dentistry of New Jersey  
Rutgers Medical School  
New Brunswick, New Jersey

Anesthesiology  
62:544, 1985

## REFERENCES

1. Eger EI II, Epstein RM: Hazards of anesthetic equipment. ANESTHESIOLOGY 25:490, 1964
2. Epstein RM, Rackow H, Lee ASJ, Papper EM: Prevention of accidental breathing of anoxic gas mixture during anesthesia. ANESTHESIOLOGY 23:1, 1962
3. Ward CS: The prevention of accidents associated with anesthetic apparatus. Br J Anaesth 40:692, 1968
4. Mazze RI: Therapeutic misadventures with oxygen delivery systems: The need for continuous in-line oxygen monitors. Anesth Analg 51:787, 1972
5. Sprague DH, Archer GW: Intraoperative hypoxia from an erroneously filled liquid oxygen reservoir. ANESTHESIOLOGY 42:360, 1975

(Accepted for publication November 6, 1984.)

## Concerning the Actions and Efficacy of Different Antacids

*To the Editor:*—We read with interest the article, "Effectiveness of Bicitra® as a Preoperative Antacid," by Gibbs *et al.*<sup>1</sup> In the introduction, the authors stated that "Although Bicitra® contains approximately the same amount of sodium citrate as does 0.3 M sodium citrate, the pH of Bicitra® is 4.8. Therefore, Bicitra's® buffering or neutralizing capacity might be less than sodium citrate." Also they stated in the discussion that "the lower mean pH with Bicitra® may be explained in part by the lower pH of the Bicitra® solution (4.8 vs. 8.5 for 0.3 M sodium citrate). The diluent effect of the higher pH solution may contribute to the greater efficacy of sodium citrate." These statements imply that the lower pH of Bicitra® is the main reason why it is less effective than sodium citrate.

Chemically, Bicitra® is a "buffering" agent (it contains a weak acid, citric acid, and its corresponding salt, sodium citrate); it is not an antacid. Theoretically, Bicitra® should be less effective in neutralizing acid in solutions than 0.3 M sodium citrate solution. This is not due to its lower pH (hence lower in diluent effect) but rather to its nature of being a "buffer" solution.

We also have been interested in a commercially available clear-liquid antacid. We have evaluated several antacids, including Bicitra®, in an animal lung model.

From our data the antacid that is comparable with or even better than 0.3 M sodium citrate solution is Alka-Seltzer® Effervescent Antacid.<sup>2</sup>

CHUN TER CHEN, M.D.  
Assistant Professor of Anesthesiology

THOMAS J. K. TOUNG, M.D.  
Associate Professor of Anesthesiology

SEMO NORA, PH.D.  
Assistant Professor of Chemistry

JOHN L. CAMERON, M.D.  
Professor of Surgery  
Departments of Anesthesiology, Chemistry,  
and Surgery  
Johns Hopkins University and School  
of Medicine  
Baltimore, Maryland 21205

## REFERENCES

1. Gibbs CP, Banner TC: Effectiveness of Bicitra® as a preoperative antacid. ANESTHESIOLOGY 61:97-99, 1984
2. Chen CT, Toung TJK, Haput HM, Hutchins GM, Cameron JL: Evaluation of the efficacy of Alka-Seltzer effervescent in gastric acid neutralization. Anesth Analg 63:325-329, 1984

(Accepted for publication November 6, 1984.)
